# Supplementary material for: Enhanced visible-light-driven photocatalytic degradation of tetracycline by Cr3+ doping SrTiO3 cubic nanoparticles
Source: Royal Society of Chemistry journal article supplement (doi:10.1039/c4ra13821j), 2015-01-01
Supplement: c4ra13821j1.pdf [file c4ra13821j1.pdf]

## Electronic Supplementary Material (ESI)

### Enhanced Visible-Light-Driven Photocatalytic Degradation of Tetracycline by Cr<sup>3+</sup> Doping SrTiO<sub>3</sub> cubic Nanoparticles

*Fanpeng Cai,<sup>a, b</sup> Yubin Tang,<sup>a,\*</sup> Fangyan Chen,<sup>a</sup> Yan Yan,<sup>b</sup> Weidong Shi,<sup>b,\*</sup>*

<sup>a</sup> School of Biology and Chemical Engineering, Jiangsu University of Science and Technology, Zhenjiang, 212003, P. R. China.

<sup>b</sup> School of Chemistry and Chemical Engineering, Jiangsu University, Zhenjiang, 212013, P. R. China.

*\*Corresponding author: Tel.: +86 511-85635850; Fax. : +86-511 85635859*

*E-mail address: [ybill@163.com](mailto:ybill@163.com)(Y-b. Tang)*

*\*Corresponding author: Tel.: +86 511 8879 0187; Fax. : +86 511 8879 1108*

*E-mail address: [swd1978@ujs.edu.cn](mailto:swd1978@ujs.edu.cn)(W. Shi)*

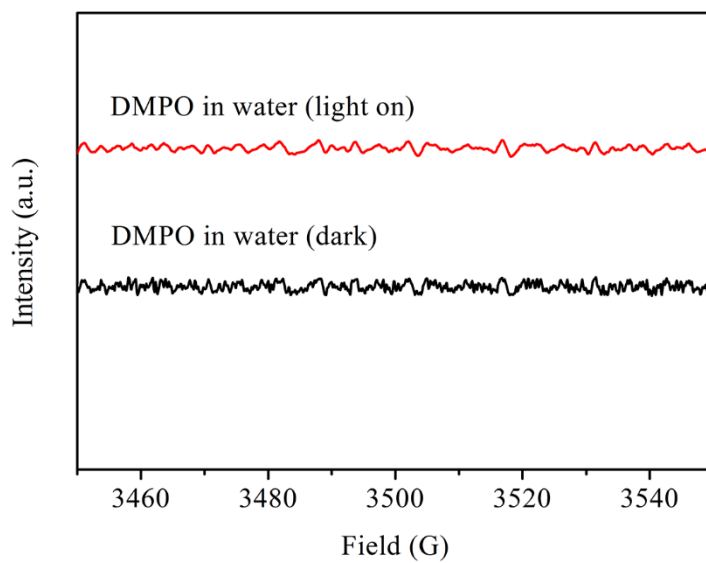

Fig. S1 the ESR without catalysts in water in dark or in visible light irradiation.

| Table. S1 the concentration of Cr <sup>6+</sup> in the solution before and after light irradiation by inductively coupled plasma atomic emission spectrometry (ICP-AES) method |                                       |
|--------------------------------------------------------------------------------------------------------------------------------------------------------------------------------|---------------------------------------|
| Sample                                                                                                                                                                         | The concentration of Cr <sup>6+</sup> |
| Integrated wastewater discharge standard of P.R.China                                                                                                                          | 0.5mg/L                               |
| The water solution Cr10 before light irradiation                                                                                                                               | 0.0309mg/L                            |
| The water solution Cr10 after light irradiation                                                                                                                                | 0.0307mg/L                            |
